# Supplementary material for: The non-centrosymmetric layered compounds IrTe2I and RhTe2I
Source: Royal Society of Chemistry journal article supplement (doi:10.1039/d2dt01224c), 2022-01-01
Supplement: d2dt01224c1.pdf [file d2dt01224c1.pdf]

## The non-centrosymmetric layered compounds IrTe<sub>2</sub>I and RhTe<sub>2</sub>I

Danrui Ni<sup>a</sup>, Xin Gui<sup>a</sup>, Bingzheng Han<sup>b</sup>, Haozhe Wang,<sup>c</sup> Weiwei Xie,<sup>c</sup> N. P. Ong<sup>b</sup>, and R. J. Cava<sup>a</sup>

<sup>a</sup>Department of Chemistry, Princeton University, Princeton, NJ 08544, United States

<sup>b</sup>Department of Physics, Princeton University, Princeton, NJ 08544, United States

<sup>c</sup>Department of Chemistry and Chemical Biology, Rutgers University, Piscataway, NJ 08854, USA

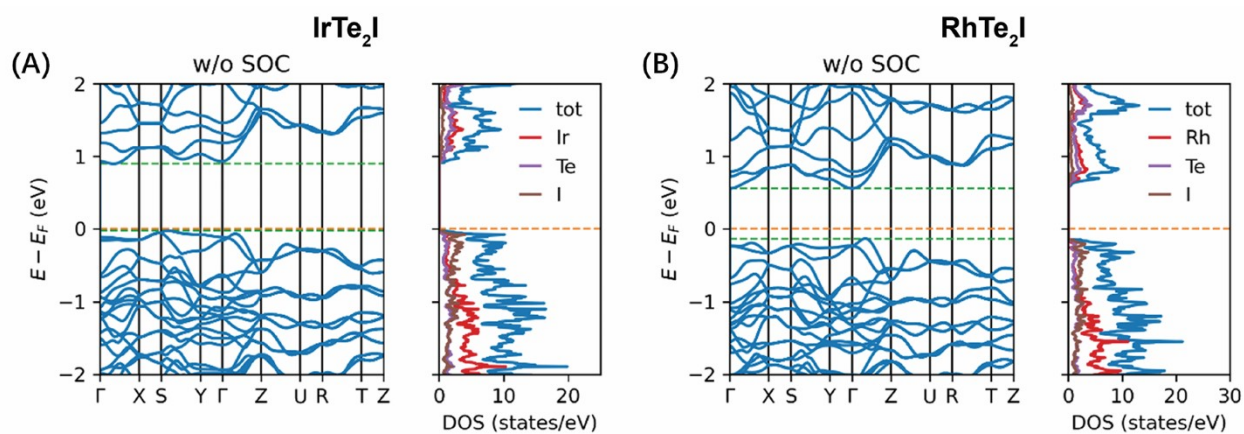

**Figure S1.** Electronic band structure and DOS for (A) IrTe<sub>2</sub>I and (B) RhTe<sub>2</sub>I without SOC included. Fermi level ( $E_F$ ), conduction band minimum (CBM), and valence band maximum (VBM) were highlighted by orange dash lines and green dash lines.

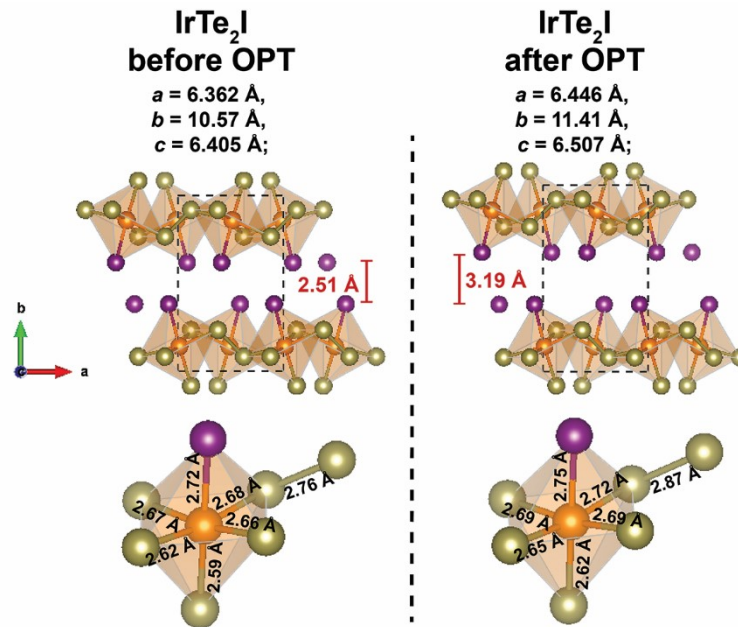

**Figure S2.** Comparison between experimental structure and the optimized structure (IrTe<sub>2</sub>I using as the representative). The latter is used for calculations of band structures and densities of states. The orange colored sphere represents Ir, the purple represents I, and the olive is Te.
